# Supplementary material
Source: publisher figshare collection journal article supplement (https://karger.figshare.com/articles/dataset/_/4542871)
Supplement: Supplementary file 1 [file 1]

**Supplementary Table 1. “ROH” region description**

| Region | N.ind | CHR | SNP1       | SNP2       | BP1       | BP2       | KB       |
|--------|-------|-----|------------|------------|-----------|-----------|----------|
| S1     | 9     | 5   | rs301286   | rs414536   | 82638711  | 84935202  | 2296.492 |
| S2     | 9     | 11  | rs4625425  | rs11040730 | 46289469  | 48315844  | 2026.376 |
| S3     | 8     | 2   | rs7585990  | rs17049898 | 59086213  | 59123264  | 37.052   |
| S4     | 8     | 5   | rs1966938  | rs9314227  | 93608749  | 97581046  | 3972.298 |
| S5     | 8     | 5   | rs26522    | rs974073   | 102512298 | 105493632 | 2981.335 |
| S6     | 8     | 5   | rs12109973 | rs7724997  | 167204911 | 167305246 | 100.336  |
| S7     | 7     | 4   | rs3796585  | rs1375138  | 156858624 | 159061598 | 2202.975 |
| S8     | 7     | 5   | rs17828812 | rs9986158  | 64886188  | 67344385  | 2458.198 |
| S9     | 7     | 10  | rs7916320  | rs2505731  | 26421818  | 31556425  | 5134.608 |
| S10    | 6     | 1   | rs601354   | rs2877978  | 179663757 | 181763281 | 2099.525 |
| S11    | 6     | 1   | rs7554297  | rs12563435 | 188030954 | 190163376 | 2132.423 |
| S12    | 6     | 3   | rs721213   | rs157297   | 5774685   | 6354792   | 580.108  |
| S13    | 6     | 5   | rs7731628  | rs13175654 | 76647020  | 79673555  | 3026.536 |
| S14    | 6     | 5   | rs248998   | rs3777041  | 79837276  | 82536051  | 2698.776 |
| S15    | 6     | 5   | rs6861829  | rs12658199 | 109911233 | 113349823 | 3438.591 |
| S16    | 6     | 5   | rs7731162  | rs11744584 | 170503280 | 173348013 | 2844.734 |
| S17    | 6     | 6   | rs12662158 | rs1107495  | 6671926   | 7671056   | 999.131  |
| S18    | 6     | 10  | rs10786961 | rs7080675  | 83954103  | 88935321  | 4981.219 |
| S19    | 6     | 15  | rs1834212  | rs10520810 | 93876557  | 94450872  | 574.316  |
| S20    | 6     | 17  | rs3760371  | rs4794295  | 43050913  | 47099992  | 4049.08  |

**N. ind** = Number of Individuals sharing that Region; **Chr** = Chromosome; **SNP1**= SNP where the Region starts; **SNP2**= SNP where the Region ends; **BP1**= genomic position where the Region starts; **BP2**= genomic position where the Region ends; **N. SNPs** = Number of SNPs within the Region.
