# Supplementary material
Source: publisher figshare collection journal article supplement (https://karger.figshare.com/articles/dataset/_/4542871)
Supplement: Supplementary file 2 [file 1]

**Supplementary Table 3. Number of deleterious and non-deleterious variation per individuals and per Megabase**

| ID    | n. Deleterious within ROH/ MB | n. Deleterious out ROH/ MB | n. Non deleterious within ROH/ MB | n. Non deleterious out ROH/ MB | n. Deleterious within ROH | n. Deleterious out ROH | n. Non deleterious within ROH | n. Non deleterious out ROH |
|-------|-------------------------------|----------------------------|-----------------------------------|--------------------------------|---------------------------|------------------------|-------------------------------|----------------------------|
| ha_s1 | 0.10                          | 0.04                       | 3.75                              | 2.30                           | 18                        | 102                    | 671                           | 5975                       |
| ha_s2 | 0.20                          | 0.03                       | 23.48                             | 3.27                           | 8                         | 85                     | 1001                          | 8944                       |
| ha_s3 | 0.10                          | 0.06                       | 4.17                              | 2.13                           | 16                        | 127                    | 612                           | 5621                       |
| hu_s1 | 0.10                          | 0.06                       | 7.43                              | 3.74                           | 14                        | 121                    | 1013                          | 9910                       |
| hu_s2 | 0.11                          | 0.04                       | 9.05                              | 3.14                           | 12                        | 95                     | 896                           | 8411                       |
| ku_16 | 0.19                          | 0.04                       | 20.06                             | 3.44                           | 8                         | 118                    | 972                           | 9400                       |
| ku_17 | 0.15                          | 0.03                       | 12.96                             | 3.33                           | 13                        | 90                     | 970                           | 9018                       |
| ku_18 | 0.12                          | 0.04                       | 9.32                              | 3.40                           | 12                        | 103                    | 920                           | 9109                       |
| ku_19 | 0.16                          | 0.04                       | 16.37                             | 3.34                           | 9                         | 101                    | 928                           | 9099                       |
| ku_20 | 0.11                          | 0.05                       | 6.50                              | 3.77                           | 15                        | 116                    | 1031                          | 9885                       |
| qa_59 | 0.13                          | 0.03                       | 20.56                             | 3.07                           | 7                         | 75                     | 804                           | 8403                       |
| qa_60 | 0.10                          | 0.04                       | 8.06                              | 3.25                           | 13                        | 98                     | 941                           | 8658                       |
| qa_62 | 0.15                          | 0.03                       | 13.40                             | 2.75                           | 9                         | 85                     | 823                           | 7460                       |
