# Supplementary material
Source: publisher figshare collection journal article supplement (https://karger.figshare.com/articles/dataset/_/4542871)
Supplement: Supplementary file 3 [file 1]

**Supplementary Table 2. “noROH” regions description**

| Chr | SNP_A      | SNP_B      | BP_A      | BP_B      | Length(Kb) |
|-----|------------|------------|-----------|-----------|------------|
| 1   | rs4654880  | rs3790623  | 21059195  | 37942165  | 16882.97   |
| 1   | rs12239301 | rs7414950  | 68055759  | 83945518  | 15889.759  |
| 2   | rs2305417  | rs6745172  | 204068446 | 218938086 | 14869.64   |
| 3   | rs901089   | rs2257216  | 32057793  | 52943766  | 20885.973  |
| 4   | rs3817444  | rs223500   | 56070738  | 103866092 | 47795.354  |
| 6   | rs519844   | rs12192237 | 54053658  | 70944663  | 16891.005  |
| 6   | rs12202212 | rs4870044  | 136060840 | 151943102 | 15882.262  |
| 7   | rs2272171  | rs12540762 | 105051538 | 127860562 | 22809.024  |
| 7   | rs10274328 | rs1124425  | 133059943 | 158812247 | 25752.304  |
| 8   | rs12386822 | rs12682379 | 30077358  | 57936352  | 27858.994  |
| 9   | rs1416505  | rs7861819  | 23063339  | 42243029  | 19179.69   |
| 10  | rs7917054  | rs868691   | 125708    | 25945882  | 25820.174  |
| 13  | rs9315226  | rs17085151 | 33066454  | 68945111  | 35878.657  |
| 14  | rs977122   | rs1538257  | 29054049  | 54949030  | 25894.981  |
| 16  | rs2280018  | rs11646602 | 15058334  | 34927027  | 19868.693  |
| 21  | rs1985740  | rs2834242  | 14095717  | 33947595  | 19851.878  |
| 22  | rs4384884  | rs1315     | 15321798  | 34946081  | 19624.283  |

**Chr** = Chromosome; **SNP1**= SNP where the Region starts; **SNP2**= SNP where the Region ends; **BP1**= genomic position where the Region starts; **BP2**= genomic position where the Region ends; **N. SNPs** = Number of SNPs within the Region.
