# Supplementary material
Source: publisher figshare collection journal article supplement (https://karger.figshare.com/articles/dataset/_/4542871)
Supplement: Supplementary file 5 [file 1]

Chr1

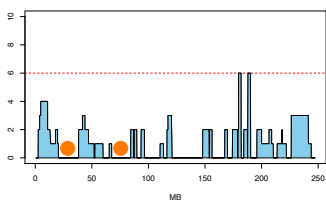

Chr2

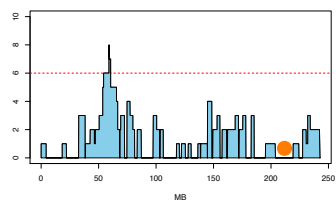

Chr3

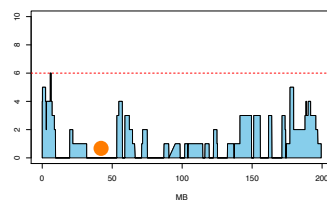

Chr4

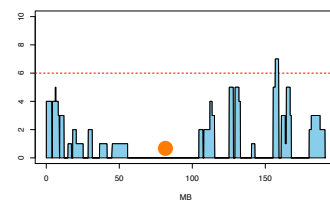

Chr5

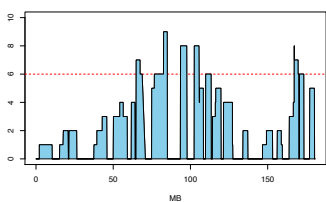

Chr6

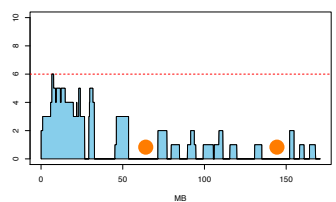

Chr7

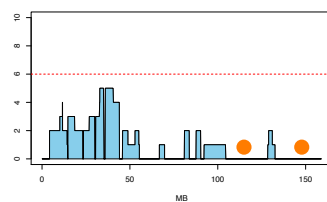

Chr8

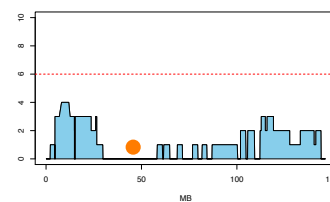

Chr9

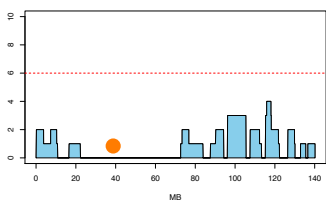

Chr10

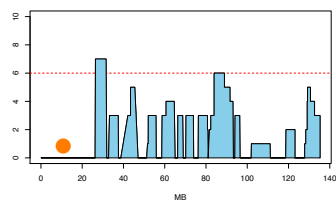

Chr11

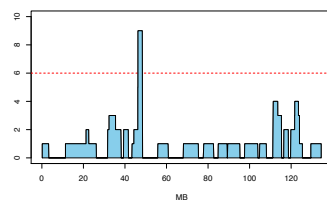

Chr12

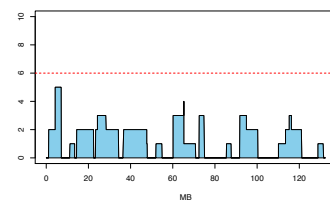

Chr13

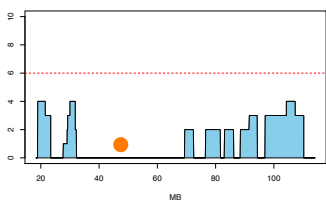

Chr14

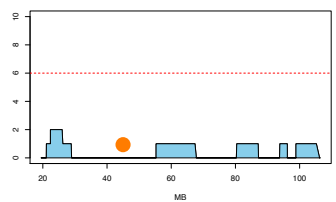

Chr15

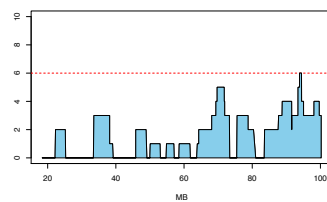

Chr16

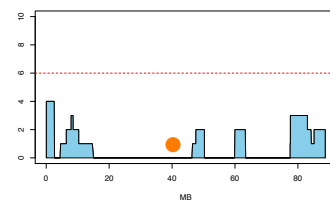

Chr17

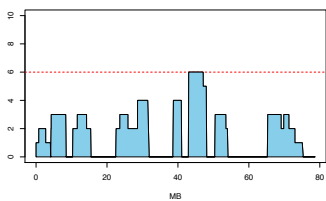

Chr18

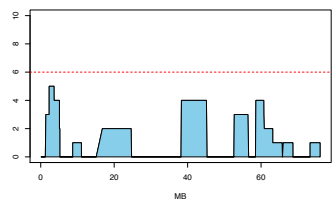

Chr19

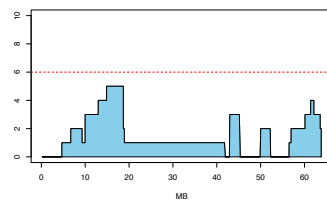

Chr20

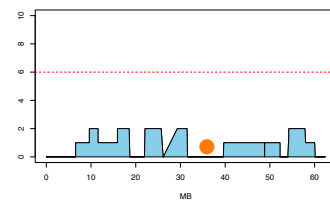

Chr21

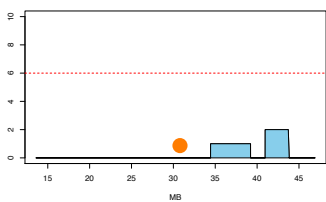

Chr22

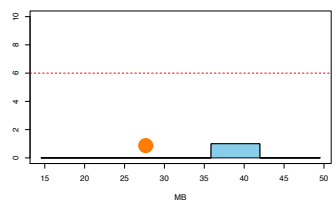

● “noROH” region

--- “ROH” region
